# Supplementary material for: Eu/Tb codoped spindle-shaped fluorinated hydroxyapatite nanoparticles for dual-color cell imaging
Source: Royal Society of Chemistry journal article supplement (doi:10.1039/c6nr02137a), 2016-01-01
Supplement: c6nr02137a1.pdf [file c6nr02137a1.pdf]

## Supporting Information

### Eu/Tb Codoped Spindle-shaped Fluorinated Hydroxyapatite Nanoparticles for Dual-Color Cell Imaging

Baojin Ma<sup>a,#</sup>, Shan Zhang<sup>a,#</sup>, Jichuan Qiu<sup>a</sup>, Jianhua Li<sup>a</sup>, Yuanhua Sang<sup>a</sup>, Haibing Xia<sup>a</sup>,  
Huaidong Jiang<sup>a,\*</sup>, Jerome Claverie<sup>b,\*</sup> and Hong Liu<sup>a,\*</sup>

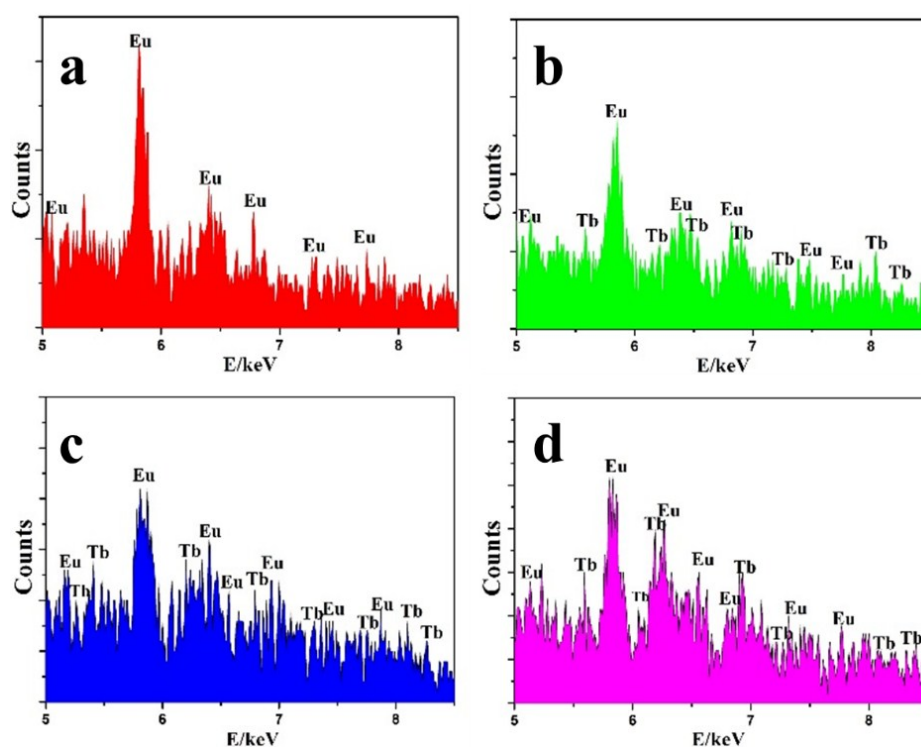

**Figure S1.** The amplified EDS patterns from 5.0 keV to 8.5 keV. a, 4% Eu doped FAp nanoparticles. b, 4%:4% Eu/Tb codoped FAp nanoparticles. c, 4%:4% Eu/Tb codoped FAp nanoparticles. d, 4%:8% Eu/Tb codoped FAp nanoparticles.

**Table S1** The ratio of oleic acid and alcohol for different size FAp nanoparticles

| Sample | Oleic acid/ml | Alcohol/ml | Ratio |
|--------|---------------|------------|-------|
| a      | 2.2           | 17.8       | 1:8   |
| b      | 4             | 16         | 1:4   |
| c      | 6.7           | 13.3       | 1:2   |
| d      | 10            | 10         | 1:1   |

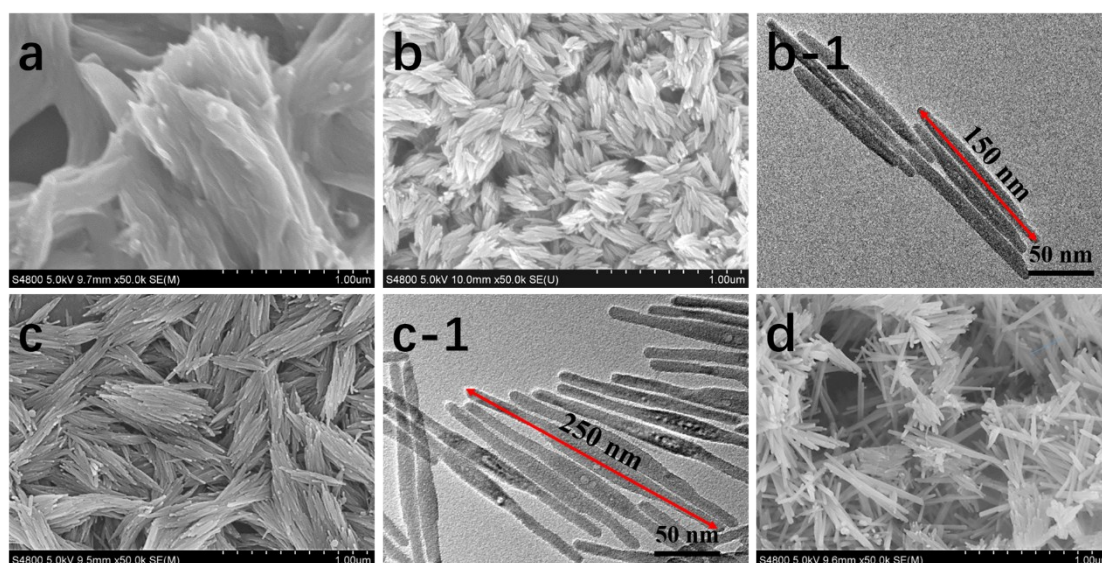

**Figure S2** The different morphology and size at the different ratio of oleic acid and alcohol. a, SEM image of the ratio=1:8; b, SEM image of the ratio=1:4; b-1, TEM image of the ratio=1:4; c, SEM image of the ratio=1:2; c-1, TEM image of the ratio=1:2; d, SEM image of the ratio=1:1;

**Table S2** The endocytosis efficiency of different size FAp nanoparticles

|              | Total | Endocytosis by cells | Endocytosis rate    |
|--------------|-------|----------------------|---------------------|
| 150 nm FAp-1 | 6 mg  | 2.83                 | 370 $\mu\text{g/h}$ |
| 150 nm FAp-2 | 6 mg  | 3.10                 |                     |
| 250 nm FAp-1 | 6mg   | 1.95                 | 230 $\mu\text{g/h}$ |
| 250 nm FAp-2 | 6mg   | 1.78                 |                     |
